# Supplementary material
Source: Research Square preprint supplement (doi:10.21203/rs.3.rs-9659402/v1)
Supplement: Supplementary file 1 [file 245e80d3d56757d681fd8aa2.docx]

**Supplementary materials**

**AI-based spectral analysis of EVs for fetus status prediction**

Seungmin Kim1#, Da Eun Jeong2#, Eunbit Park2, Hyo Jin Lee2, Young Mi Jung2, Hyeon Ji Kim2, Jihyun Hwang1, Eun Byul Lee3, Hyunku Shin3, Jee Yoon Park2* and Yeonho Choi1,3,4*

1 Department of Biomedical Engineering, Korea University, Seoul 02841, Republic of Korea

2 Department of Obstetrics and Gynecology, Seoul National University, Bundang Hospital, Seoul National University College of Medicine, Gyeonggi-do 13620, Republic of Korea

3 Exopert Corporation, Seoul 02582, Republic of Korea

4 School of Biomedical Engineering, Korea University, Seoul 02841, Republic of Korea

**Corresponding authors:**

Jee Yoon Park (jyparkmd08@snu.ac.kr)

Yeonho Choi (yeonhochoi@korea.ac.kr)

# These authors contributed equally to this work

**
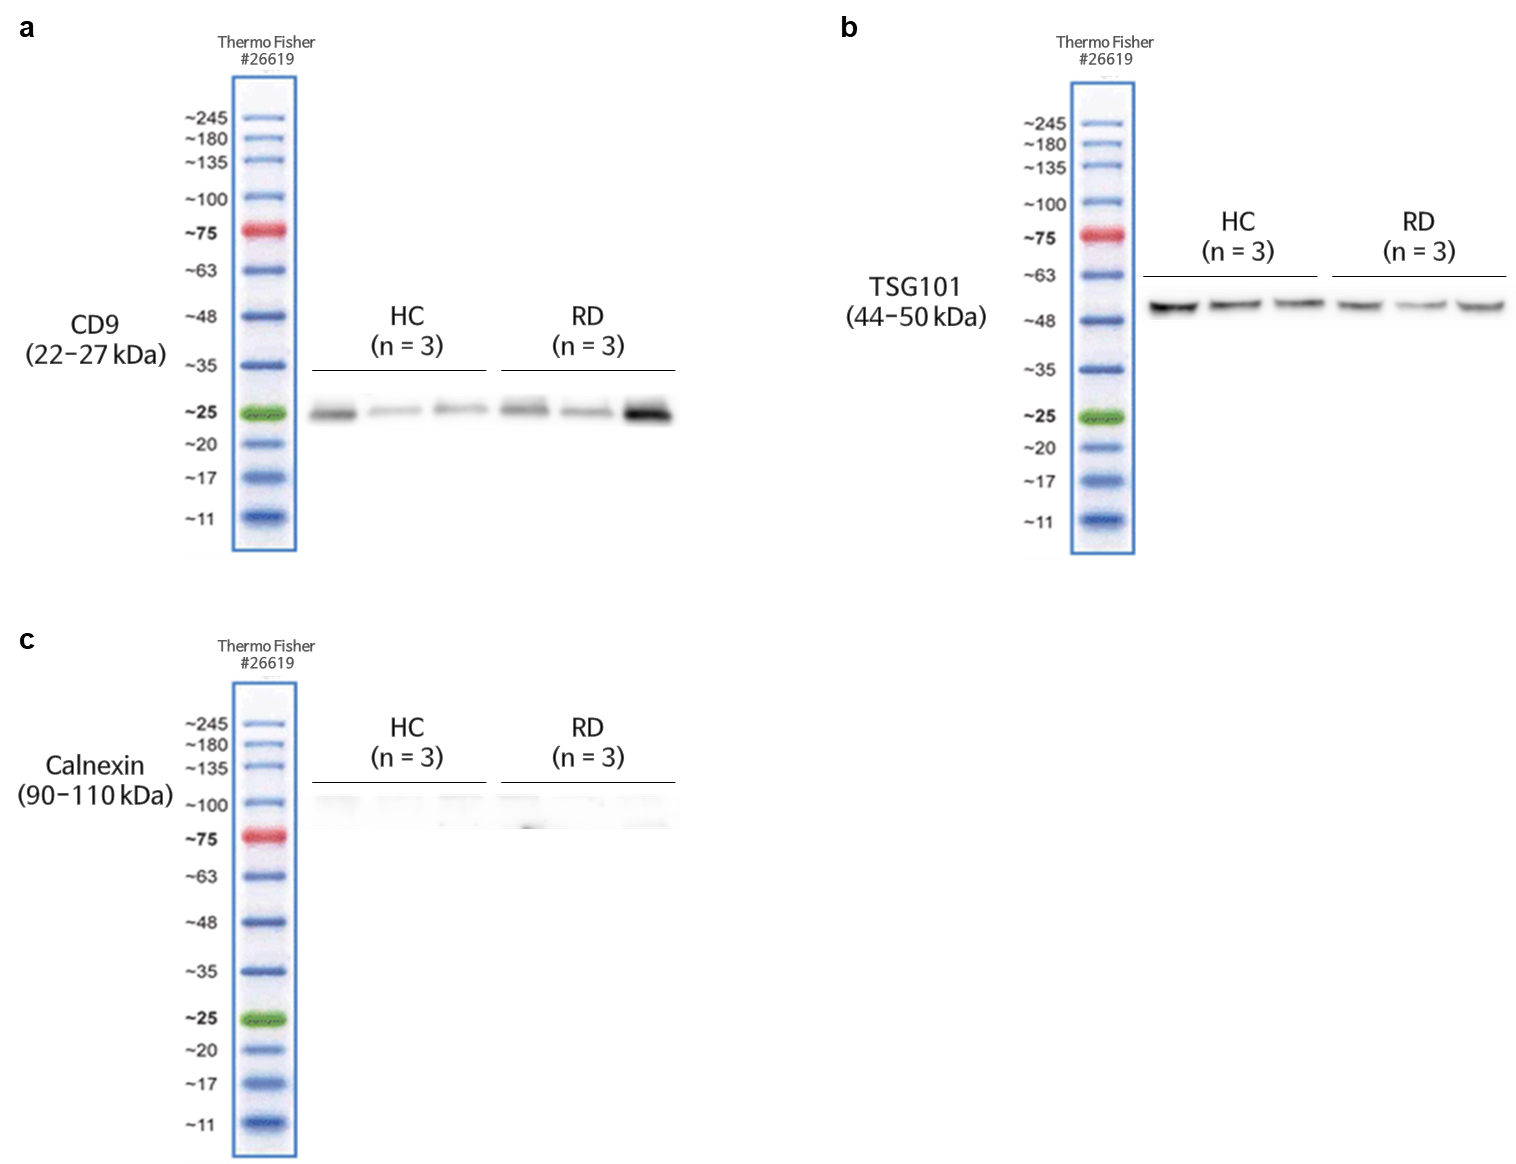
 Supplementary Figure 1. Raw western blotting image of isolated EVs**

**(a-c)** Raw western blot data. For western blot analysis, each nitrocellulose membrane was cut by referring to the protein ladder according to the protein size and identifying the protein expression. EV proteins were immunoblotted using antibodies against CD9, TSG101, and calnexin

**
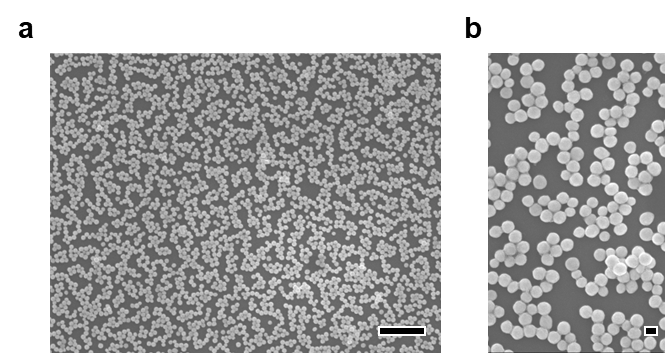
**

**Supplementary Figure 2. SEM image of the SERS substrate**

**(a-b)** SEM images of the SERS substrate prepared by coating 100 nm gold nanoparticles (GNPs) onto a glass surface. Low- and high-magnification images demonstrate the uniform distribution and dense packing of GNPs, enabling consistent Raman signal enhancement. Scale bar = 1μm **(a)** and 100 nm **(b)**.


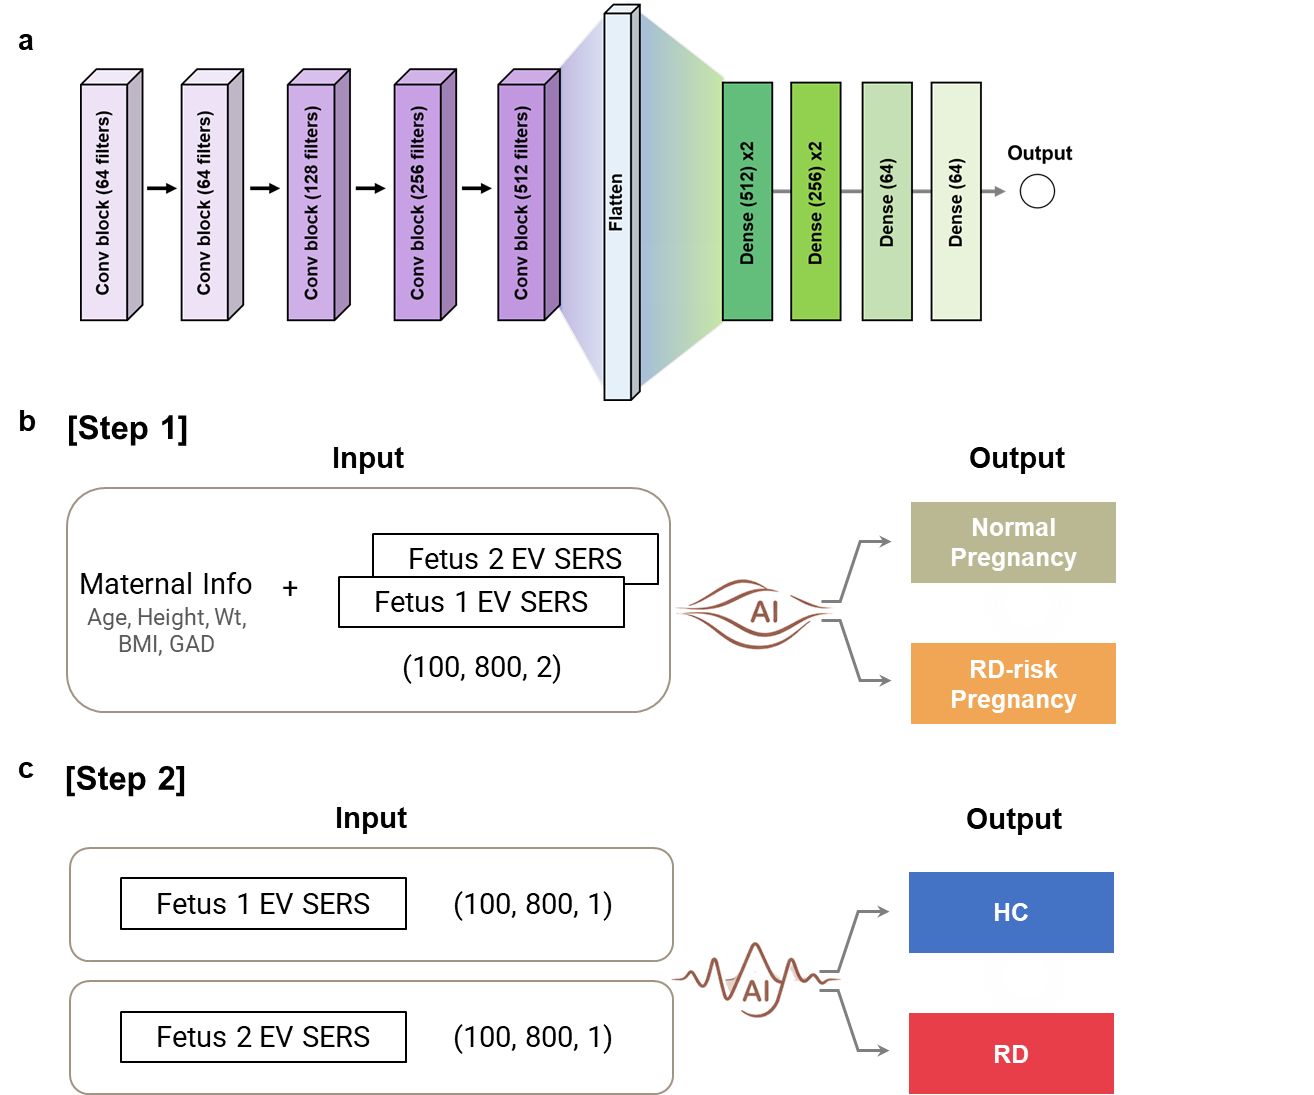


**Supplementary Figure 3. CNN architecture and step-wise framework**

**(a) S**chematic illustration of the CNN architecture. The model consists of sequential convolutional blocks with increasing filter sizes (64–512), followed by fully connected layers for feature extraction and classification. **(b)** Step 1: Pregnancy-level risk screening. Combined inputs including maternal clinical information (age, height, weight, BMI, and gestational age) and paired EV SERS spectra from fetus 1 and fetus 2 were used to classify pregnancies into normal and RD-risk groups. **c)** Step 2: Fetus-level prediction. Individual EV SERS spectra from each fetus were used as input to predict RD at the fetus-specific level, classifying each fetus as HC or RD.

**
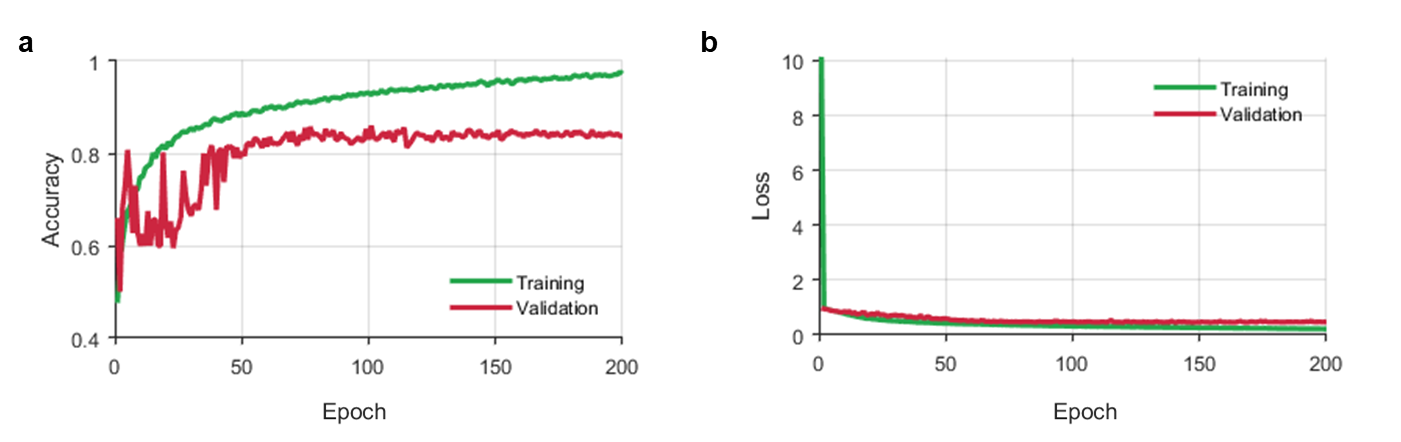
**

**Supplementary Figure 4. Model diagnostic performance for the RD-risk pregnancy prediction (a-b)** Results of training the deep learning model

**
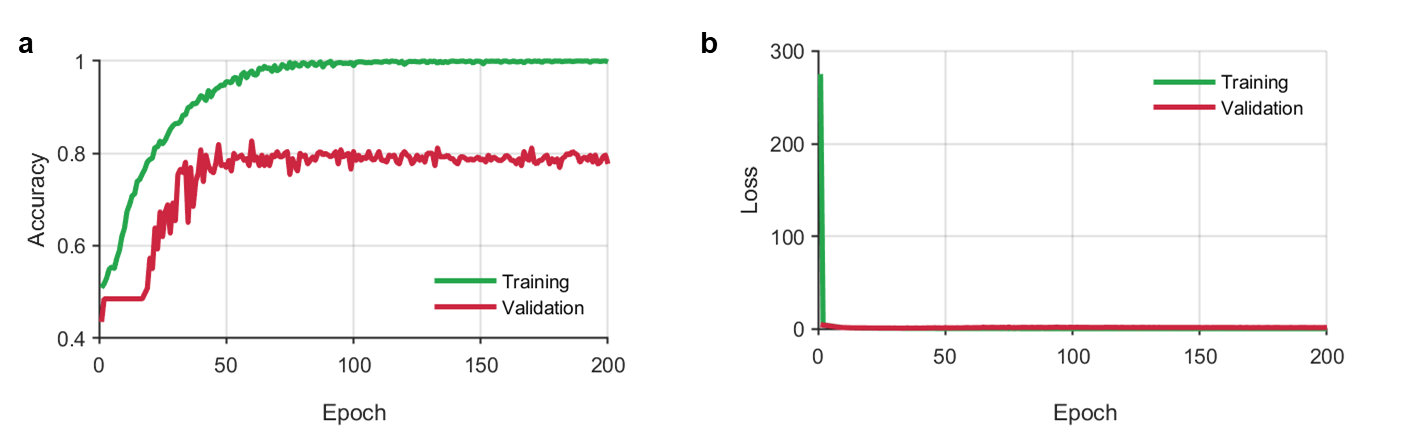
**

**Supplementary Figure 5 . Model diagnostic performance for the RD fetus prediction (a-b)** Results of training the deep learning model


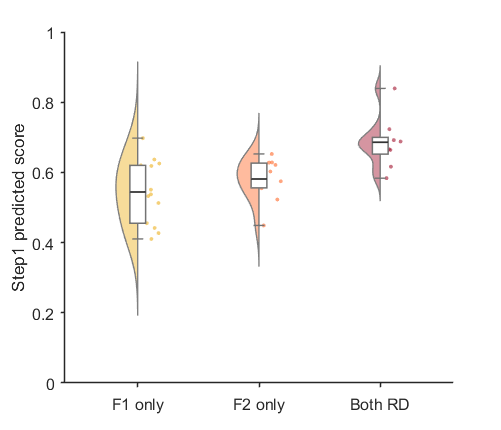


**Supplementary Figure 6. Violin plots of Step 1 predicted scores across RD-risk pregnancy subtypes**

RD-risk pregnancies were stratified into three groups based on fetal respiratory distress status: fetus 1 only (F1 only), fetus 2 only (F2 only), and both fetuses with RD (Both RD). The distributions of predicted scores demonstrate increasing risk levels across subgroups, indicating that the Step 1 model captures the severity and burden of fetal respiratory distress at the pregnancy level.


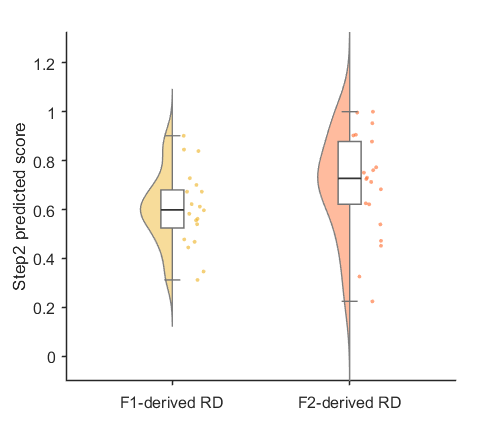


**Supplementary Figure 7. Violin plots of Step 2 predicted scores across fetus with RD**

Violin plots of Step 2 predicted scores stratified by fetus-specific respiratory distress origin. RD cases were grouped as fetus 1–derived RD (F1-derived RD) and fetus 2–derived RD (F2-derived RD). The distributions of predicted scores demonstrate that the Step 2 model consistently identifies fetus-specific RD, supporting its ability to distinguish individual fetal risk within twin pregnancies.

**
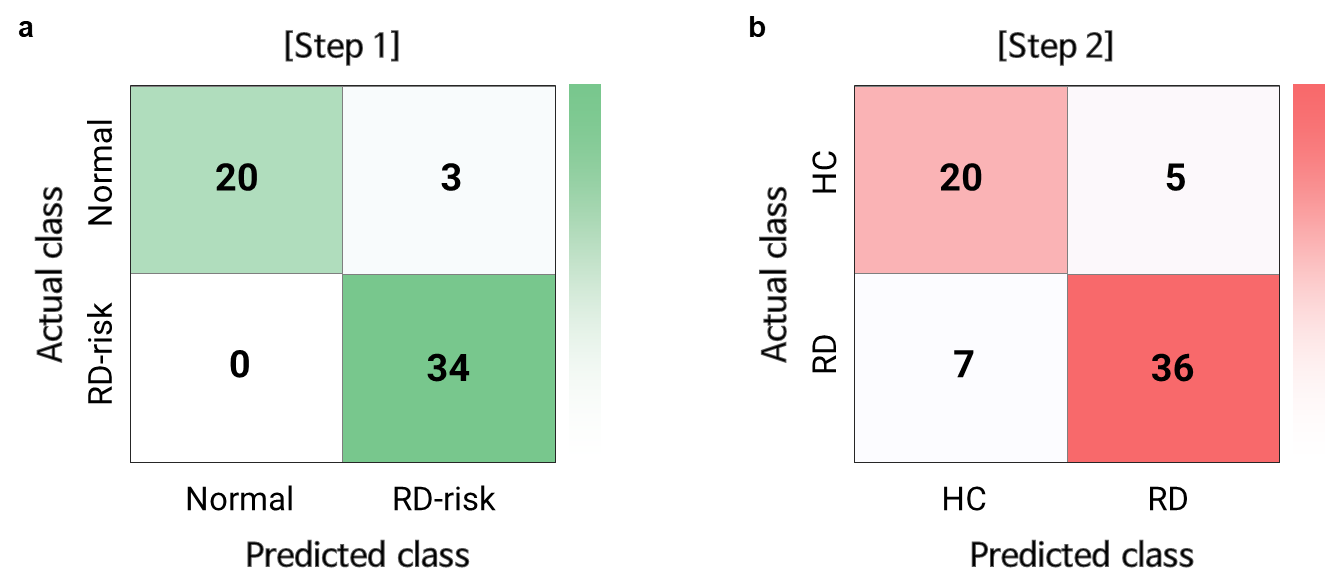
**

**Supplementary Figure 8. Confusion matrix for the evaluation sample**

**(a-b)** Evaluation samples were predicted using the entire algorithm including step 1**(a)** and 2 **(b)**.


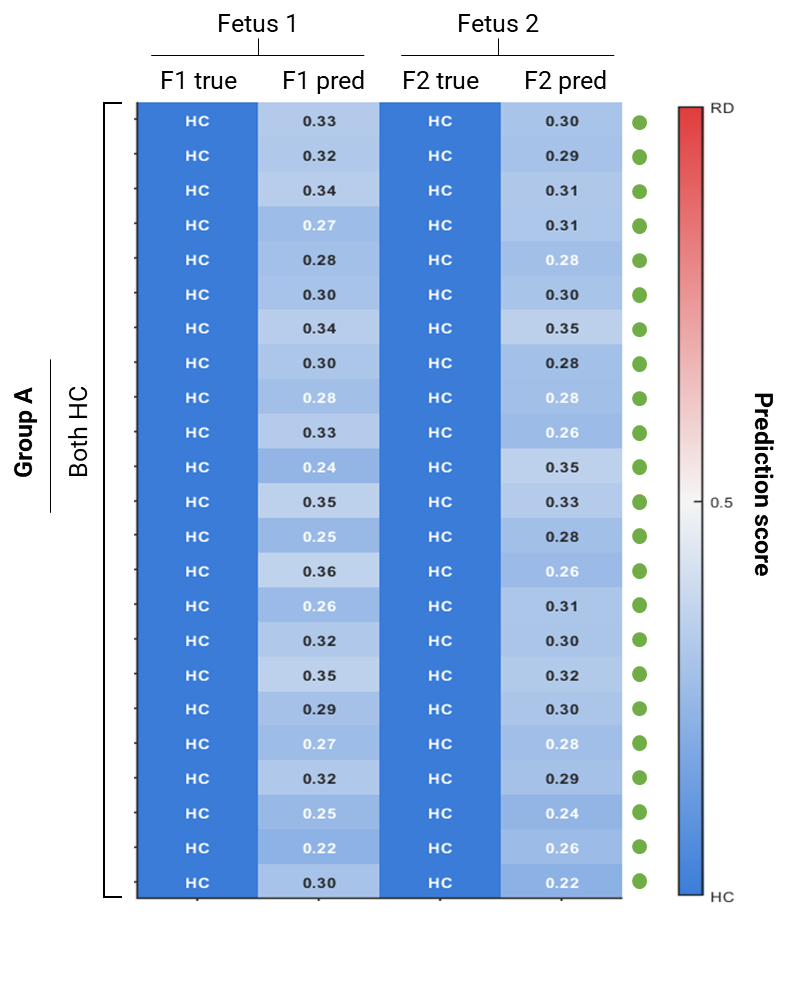


**Supplementary Figure 9. Twin-level prediction patterns across pregnancies in Group A**


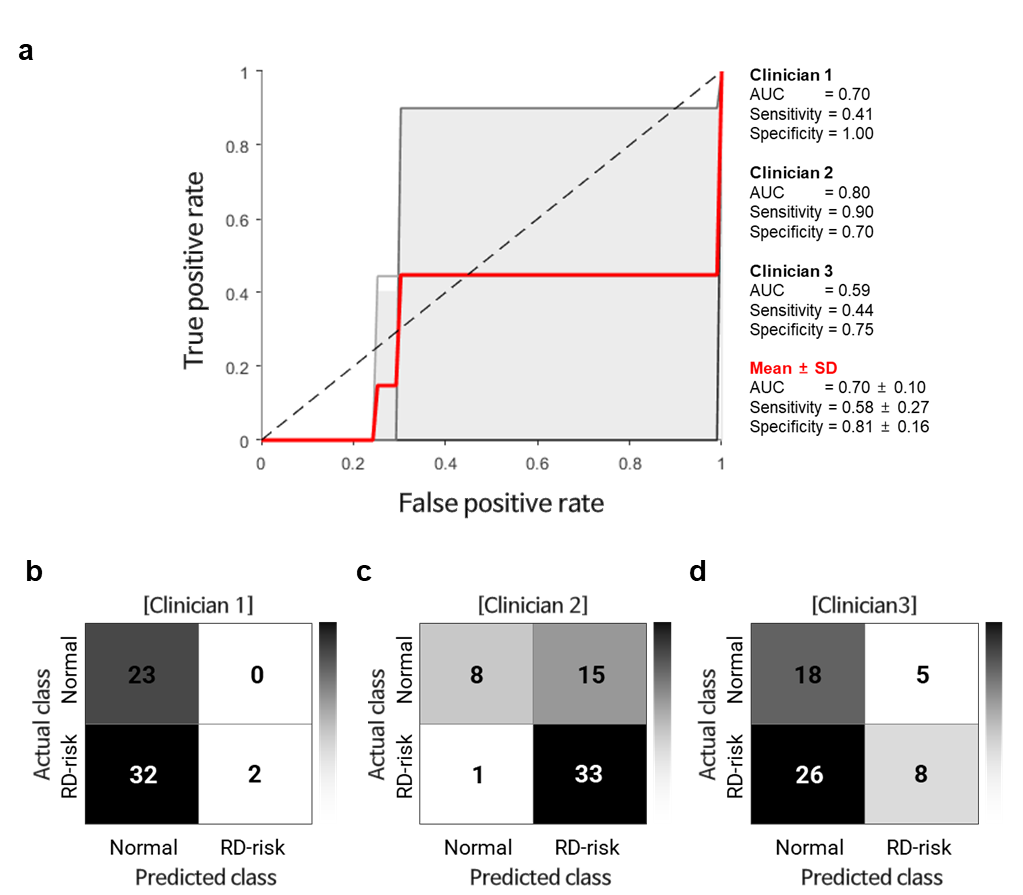


**Supplementary Figure 10. Clinician-based prediction using conventional assessment in the blind test set**

**(a)** Mean ROC curve with standard deviation (± SD) across three clinicians. (**b–d)** Confusion matrices for individual clinicians (Clinicians 1–3), where predictions were made using conventional clinical assessment.

**Supplementary Table 1. Clinical characteristics of the pregnant woman.**

| Characteristics |  |
| --- | --- |
| **Maternal Characteristics** | **n =100** |
| Age (years) | |  | | --- |   36.0 [33.0–38.0] |
| Height (cm) | 162.4 [158.4–165.9] |
| Prepregnancy weight (kg) | 56.5 [53.0–65.3] |
| Prepregnancy BMI (kg/m2) | 21.93 [20.00–25.26] |
| Nulliparous | 84.0% (84) |
| Conception by assisted reproduction |  |
| … Intrauterine insemination | 4.0% (4) |
| … In vitro fertilization & embryo transfer | 83.0% (83) |
| Monochorionicity | 8% (8) |
| **Maternal comorbidities & pregnancy complications** | **n =100** |
| Gestational hypertension | 12.0% (12) |
| Chronic hypertension | 1.0% (1) |
| Preeclampsia | 11.0% (11) |
| Gestational diabetes mellitus | 8.0% (8) |
| Pregestational diabetes mellitus | 3.0% (3) |
| Diabetes mellitus controlled by insulin | 5.0% (5) |
| Preterm labor with use of tocolytics | 15.0% (15) |
| Cerclage operation before 24 weeks of gestation | 4.0% (4) |
| Antenatal corticosteroids administration | 11.0% (11) |
| Placenta previa | 2.0% (2) |
| **Neonatal outcomes** | **N=200** |
| Gestational age at delivery (weeks) | 36.3 [36.0-36.9] |
| …Preterm birth before 36 weeks of gestation | 22% (44/200) |
| Birthweight (grams) | 2400 [2168-2603] |
| …Small for gestational age below 10 percentile | 10.5% (21) |
| …Large for gestational age over 10 percentile | 0.5% (1) |
| Male | 46.5% (93) |
| Cord pH | 7.325 [7.308-7.347] |
| Low Apgar score below 7 at 1 minute | 9.0% (18) |
| Low Apgar score below 7 at 5 minutes | 1.0% (2) |
| Intubation | 4.0% (8) |
| Non-invasive oxygen assistance* | 30.0% (60) |
| Respiratory distress syndrome | 3.0% (6) |
| Jaundice with phototherapy | 16.0% (32) |
| Intraventricular hemorrhage | 0.5% (1) |
| Early onset sepsis | 3.0% (6) |
| Retinopathy of prematurity | 0.5% (1) |
| Hypoglycemia | 4.0% (8) |
| Hospital stay(days) | 5 [5-6] |
| Survival at discharge | 100% (200) |

Values are given as median [interquartile range, 25–75th percentile] or percentage (n).

*Non-invasive oxygen assistance includes Continuous Positive Airway Pressure (CPAP), Non-invasive Positive Pressure Ventilation (NIPPV), High Flow Nasal Cannula (HFNC)

**Supplementary Table 2. Performance of step 1 model for RD-risk pregnancy screening in 5-fold CV.**

|  | **Accuracy** | | | | | **Mean** |
| --- | --- | --- | --- | --- | --- | --- |
| CV1 | CV2 | CV3 | CV4 | CV5 |
| **Training** | 1 | 1 | 0.99 | 0.99 | 0.99 | 0.99 ± 0.005 |
| **Validation** | 0.86 | 0.80 | 0.85 | 0.79 | 0.78 | 0.81 ± 0.036 |

|  | **Loss** | | | | | **Mean** |
| --- | --- | --- | --- | --- | --- | --- |
| CV1 | CV2 | CV3 | CV4 | CV5 |
| **Training** | 0.12 | 0.11 | 0.11 | 0.11 | 0.11 | 0.11 ± 0.005 |
| **Validation** | 0.74 | 1.14 | 0.77 | 1.05 | 1.11 | 0.96 ± 0.2 |

**Supplementary Table 3. Performance of step 2 model for RD fetus prediction in 5-fold CV.**

|  | **Accuracy** | | | | | **Mean** |
| --- | --- | --- | --- | --- | --- | --- |
| CV1 | CV2 | CV3 | CV4 | CV5 |
| **Training** | 1 | 0.99 | 1 | 1 | 0.99 | 0.99 ± 0.0055 |
| **Validation** | 0.78 | 0.77 | 0.78 | 0.79 | 0.79 | 0.78 ± 0.008 |

|  | **Loss** | | | | | **Mean** |
| --- | --- | --- | --- | --- | --- | --- |
| CV1 | CV2 | CV3 | CV4 | CV5 |
| **Training** | 0.07 | 0.06 | 0.06 | 0.08 | 0.07 | 0.068 ± 0.0084 |
| **Validation** | 1.33 | 1.43 | 1.22 | 1.19 | 1.14 | 1.262 ± 0.118 |

**Supplementary Table 4.** **Clinician-based predictions using conventional assessment in the blind test set**

| **Information** | | **Blind tests results** | | |
| --- | --- | --- | --- | --- |
| Pregnancy case | GAD | Clinician 1 | Clinician 2 | Clinician 3 |
| HC1 | 37.1 | HC | HC | HC |
| HC2 | 37.1 | HC | HC | HC |
| HC3 | 35.7 | HC | RD-risk | RD-risk |
| HC4 | 36.6 | HC | RD-risk | HC |
| HC5 | 35.4 | HC | RD-risk | RD-risk |
| HC6 | 37.0 | HC | HC | HC |
| HC7 | 36.9 | HC | RD-risk | HC |
| HC8 | 36.6 | HC | RD-risk | HC |
| HC9 | 36.0 | HC | RD-risk | HC |
| HC10 | 36.9 | HC | RD-risk | HC |
| HC11 | 36.6 | HC | RD-risk | HC |
| HC12 | 37.1 | HC | HC | HC |
| HC13 | 35.6 | HC | RD-risk | RD-risk |
| HC14 | 36.4 | HC | RD-risk | HC |
| HC15 | 37.3 | HC | HC | HC |
| HC16 | 36.7 | HC | RD-risk | HC |
| HC17 | 36.3 | HC | RD-risk | HC |
| HC18 | 37.0 | HC | HC | HC |
| HC19 | 36.9 | HC | RD-risk | HC |
| HC20 | 37.9 | HC | HC | HC |
| HC21 | 37.1 | HC | HC | HC |
| HC22 | 36.4 | HC | RD-risk | HC |
| HC23 | 37.1 | HC | HC | HC |
| RD1 | 36.1 | HC | RD-risk | HC |
| RD2 | 32.6 | RD-risk | RD-risk | RD-risk |
| RD3 | 36.9 | HC | RD-risk | HC |
| RD4 | 35.4 | HC | RD-risk | RD-risk |
| RD5 | 36.7 | HC | RD-risk | HC |
| RD6 | 35.7 | HC | RD-risk | RD-risk |
| RD7 | 35.1 | HC | RD-risk | RD-risk |
| RD8 | 36.6 | HC | RD-risk | RD-risk |
| RD9 | 36.4 | HC | RD-risk | HC |
| RD10 | 36.0 | HC | RD-risk | HC |
| RD11 | 36.0 | HC | RD-risk | HC |
| RD12 | 36.1 | HC | RD-risk | HC |
| RD13 | 36.3 | HC | RD-risk | HC |
| RD14 | 37.3 | HC | HC | HC |
| RD15 | 36.7 | HC | RD-risk | HC |
| RD16 | 36.3 | HC | RD-risk | HC |
| RD17 | 36.4 | HC | RD-risk | HC |
| RD18 | 35.1 | HC | RD-risk | RD-risk |
| RD19 | 36.1 | HC | RD-risk | HC |
| RD20 | 36.3 | HC | RD-risk | HC |
| RD21 | 36.3 | HC | RD-risk | HC |
| RD22 | 31.1 | RD-risk | RD-risk | RD-risk |
| RD23 | 36.3 | HC | RD-risk | HC |
| RD24 | 35.4 | HC | RD-risk | RD-risk |
| RD25 | 36.0 | HC | RD-risk | HC |
| RD26 | 35.6 | HC | RD-risk | RD-risk |
| RD27 | 36.3 | HC | RD-risk | HC |
| RD28 | 36.1 | HC | RD-risk | HC |
| RD29 | 36.0 | HC | RD-risk | HC |
| RD30 | 36.3 | HC | RD-risk | HC |
| RD31 | 36.1 | HC | RD-risk | HC |
| RD32 | 36.9 | HC | RD-risk | HC |
| RD33 | 36.7 | HC | RD-risk | HC |
| RD34 | 35.4 | HC | RD-risk | RD-risk |
